# Supplementary material for: Gas hydrates model for the mechanistic investigation of the Wittig reaction “on water”
Source: Royal Society of Chemistry journal article supplement (doi:10.1039/c5ra25747f), 2016-01-01
Supplement: c5ra25747f1.pdf [file c5ra25747f1.pdf]

Table S1

|                     | Total electronic energy | Zero point corrected E | Gibbs Free energy |
|---------------------|-------------------------|------------------------|-------------------|
| Ylide water complex | -2832.1294691           | -2831.267545           | -2831.376151      |
| Trans TS1           | -3177.6742178           | -3176.70053            | -3176.816261      |
| Trans OP1           | -3177.6926549           | -3176.716344           | -3176.83219       |
| Trans OP2           | -3177.692712            | -3176.716881           | -3176.833907      |
| Trans PW            | -3177.7770413           | -3176.801006           | -3176.920388      |
| Cis TS1             | -3177.6754871           | -3176.700689           | -3176.810672      |
| Cis OP1             | -3177.6913687           | -3176.714995           | -3176.830229      |

Table SI2. Free energies of activation for cis and trans Wittig addition at B3LYP methods with different basis sets

| Level of theory     | $\Delta G^\ddagger$ trans addition | $\Delta G^\ddagger$ trans addition |
|---------------------|------------------------------------|------------------------------------|
| B3LYP/6-311G(d,p)   | 26.21609189                        | 29.07126012                        |
| B3LYP/6-311+G(d)    | 27.79992587                        | 32.71207024                        |
| B3LYP/6-311+G(d,p)  | 26.07176471                        | 31.16023924                        |
| B3LYP/6-311++G(d,p) | 26.01717138                        | 31.12760875                        |

Table SI 3. Comparison of free energies of activation for cis and trans Wittig on water and under neat conditions reaction at different levels of theories

|                            | <i>Cis</i> ( $\Delta G^\ddagger$ ) | <i>Trans</i> ( $\Delta G^\ddagger$ ) |
|----------------------------|------------------------------------|--------------------------------------|
| <b>M05-2x/6-31G(D)</b>     |                                    |                                      |
| On water                   | 17.94                              | 19.04                                |
| Neat conditions            | 18.95                              | 16.82                                |
| <b>B3LYP/6-31G(D)</b>      |                                    |                                      |
| On water                   | 26.24                              | 25.12                                |
| Neat conditions            | 28.52                              | 26.51                                |
| <b>B3LYP/6-311++G(D,P)</b> |                                    |                                      |
| On water                   | 26.02                              | 31.13                                |
| Neat conditions            | 31.57                              | 29.15                                |

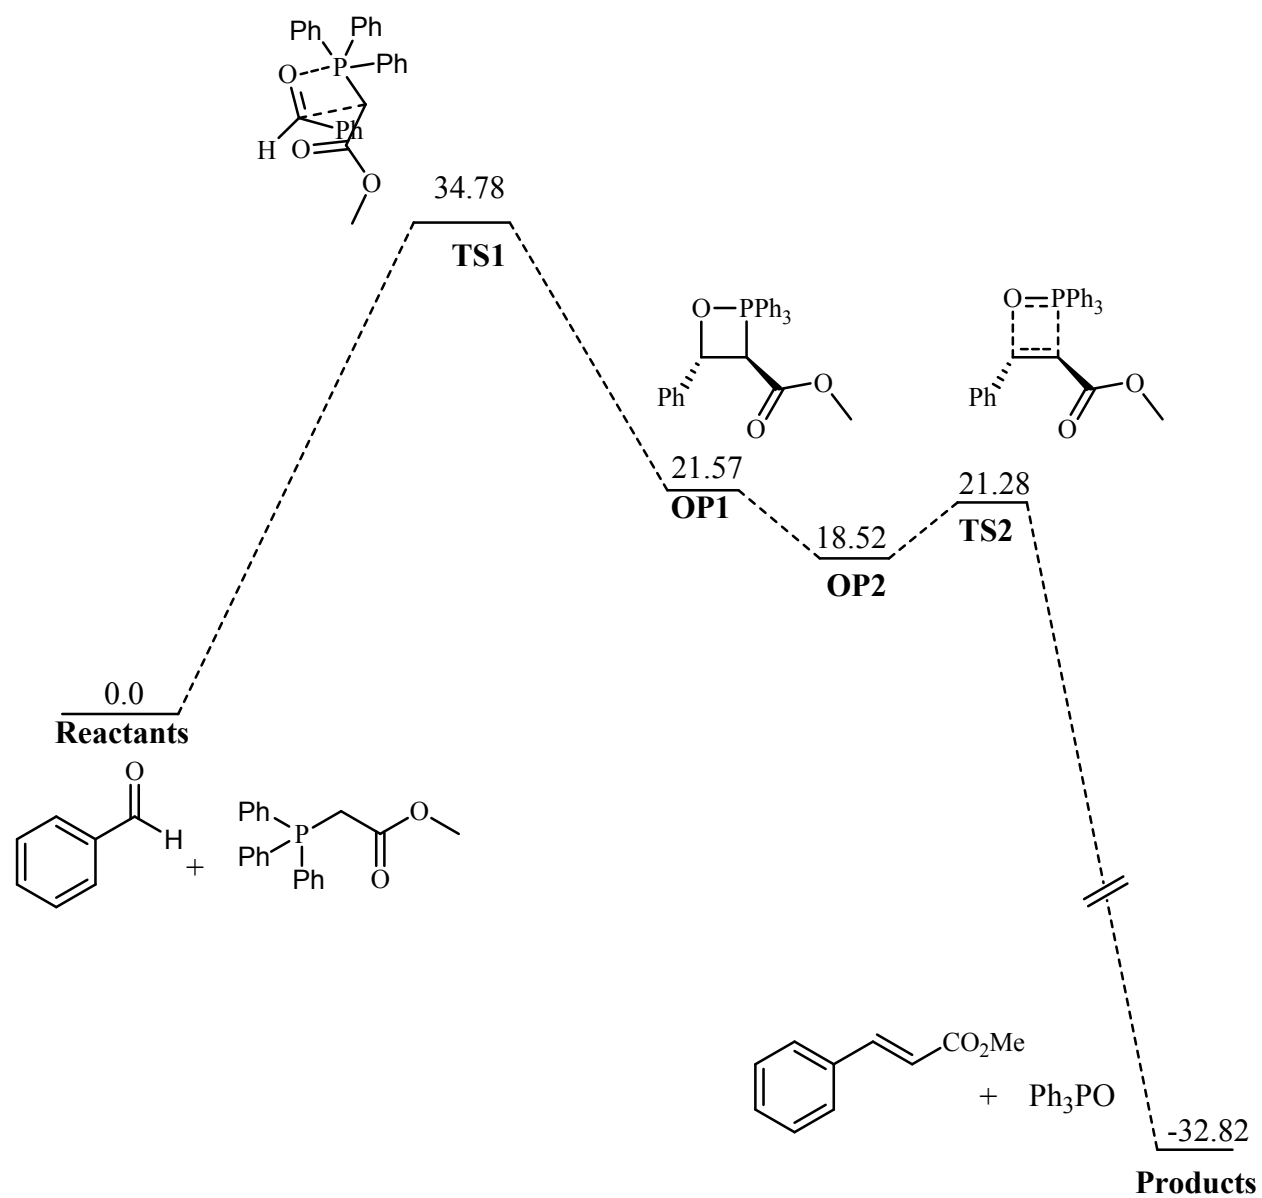

Figure S1. Gibbs free energy profile for *trans* Wittig reaction in neat conditions. All energies are relative to benzaldehyde and ylide. Unnecessary hydrogen atoms are removed for clarity

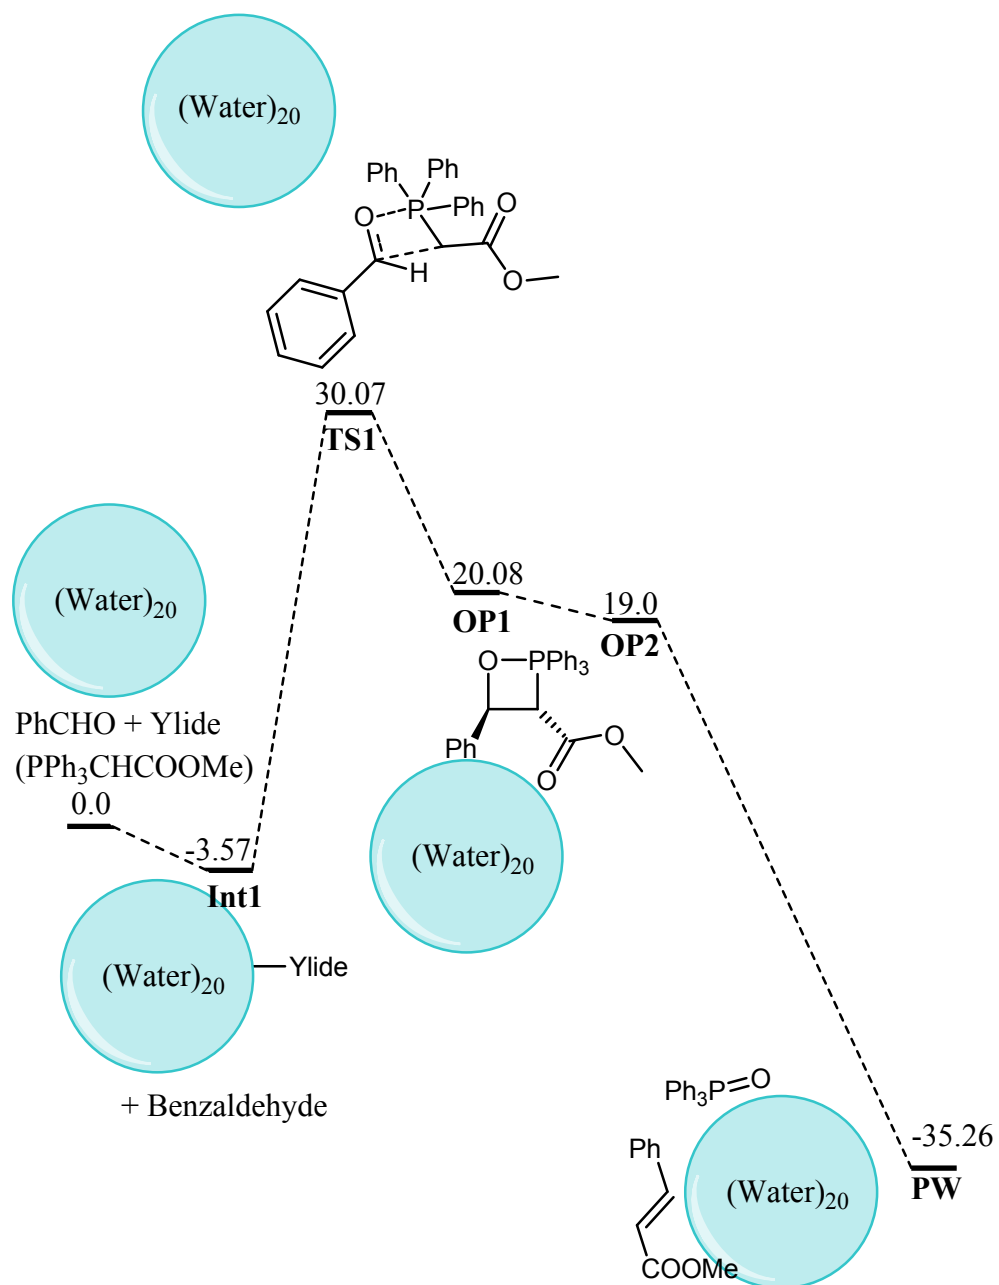

Figure S2. Gibbs free energy profile for *trans* Wittig reaction on water, all energies are Gibbs free energies relative to benzaldehyde, ylide and water 20 species

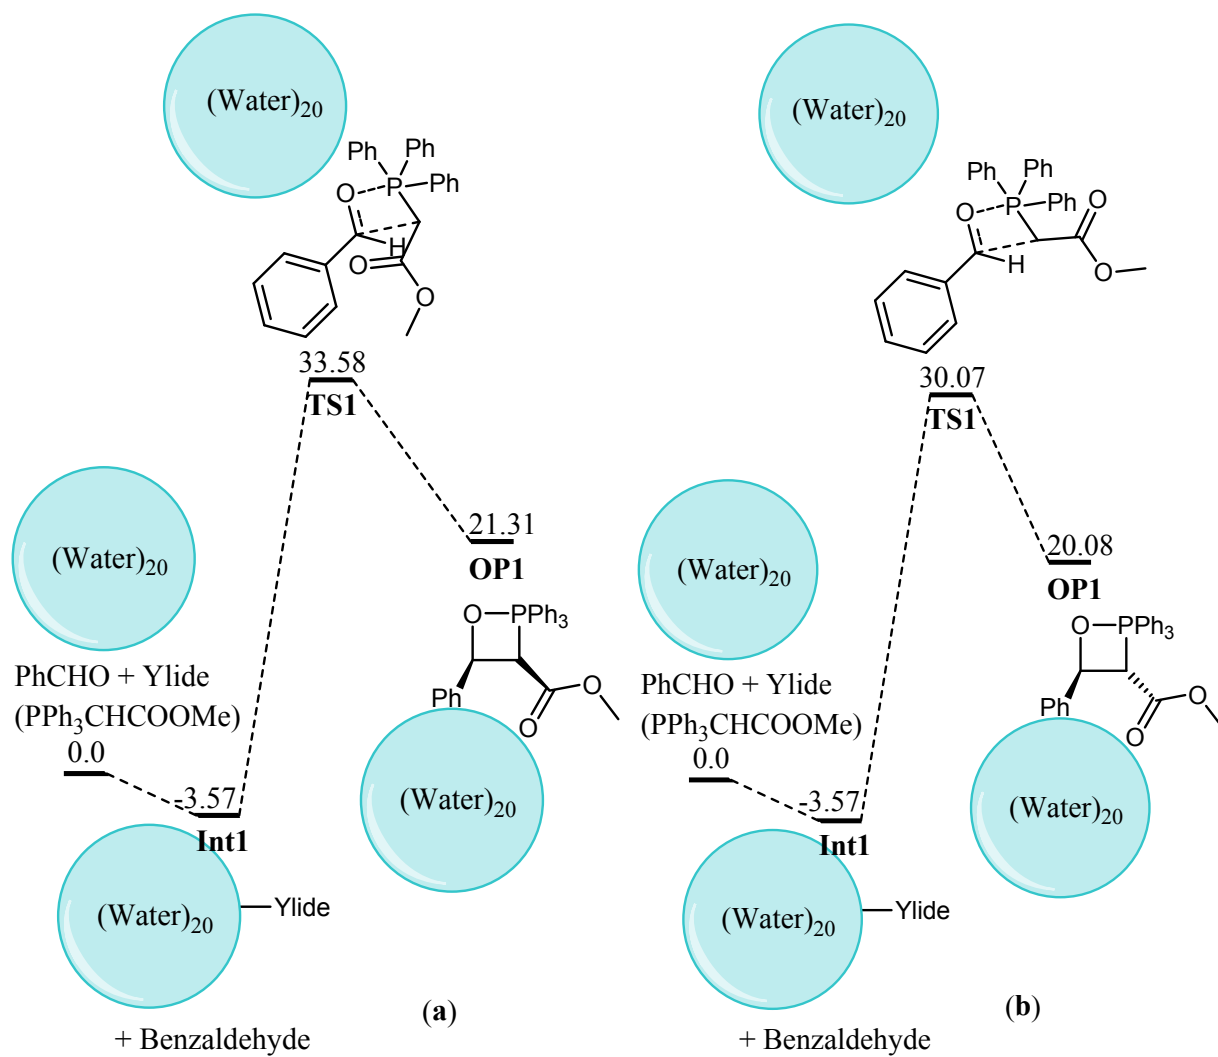

Figure S3. Comparative Gibbs free energy profile for the rate determining step cis (a) and trans (b) witting on water

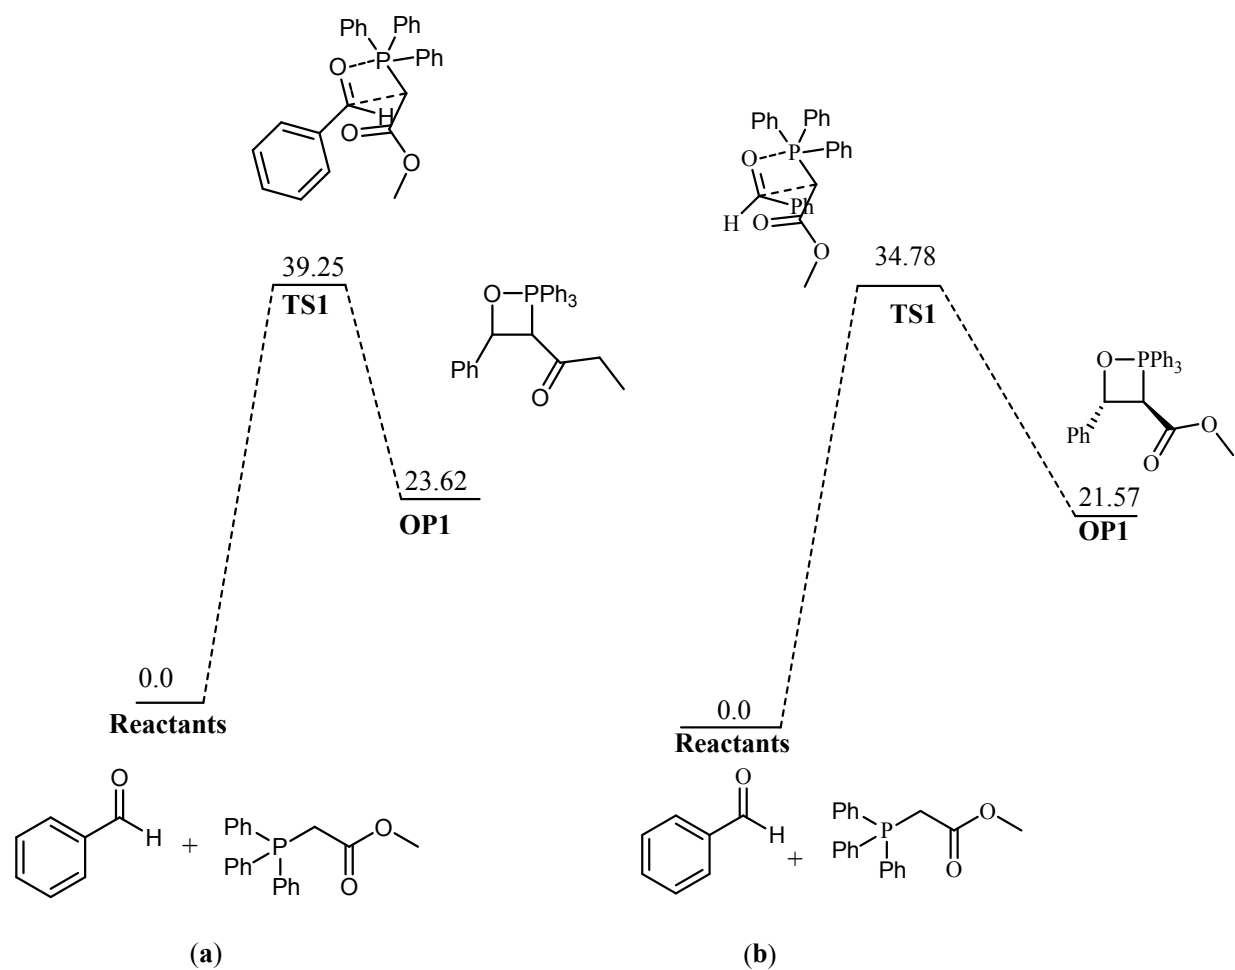

Fig S4. Comparative Gibbs free energy profile for the rate determining step *cis* (a) and *trans* (b) Wittig under neat conditions

**PPH3 Ylide water 20 complex**

|   |            |             |             |
|---|------------|-------------|-------------|
| O | 4.55267600 | 2.14366600  | 2.99280600  |
| O | 3.48522700 | 3.79682900  | 1.24842600  |
| O | 5.10596300 | 3.52920500  | -0.99318500 |
| O | 7.31245000 | 1.86107800  | -0.47105200 |
| O | 6.98316500 | 1.07812200  | 2.08733200  |
| O | 6.49382900 | -1.72782500 | 2.01147100  |
| O | 6.71743800 | -2.57960100 | -0.42094900 |
| O | 7.03677500 | -0.26448500 | -1.88039800 |
| O | 4.27798600 | -3.60687500 | -1.29331800 |
| O | 2.66679900 | -3.58157600 | 0.76517500  |
| O | 4.02804300 | -2.32886200 | 2.88563900  |
| O | 0.81331700 | -1.62195800 | 0.28411600  |
| O | 2.18714700 | -0.49251400 | -1.70028900 |
| O | 3.07027500 | -2.30386800 | -3.46518000 |
| O | 1.29426100 | 1.90350900  | -2.16847000 |
| O | 1.06761000 | 2.61048600  | 0.44515700  |
| O | 0.76289000 | 0.32135500  | 2.08626300  |
| O | 3.83367500 | 2.69994400  | -3.13520600 |
| O | 4.57410400 | 0.05152300  | -3.00256300 |
| O | 2.82861500 | 0.08805800  | 3.79389800  |
| H | 4.73875700 | 2.71821100  | 3.75096700  |
| H | 4.12626500 | 2.75632200  | 2.30771200  |
| H | 2.59993900 | 3.46853100  | 0.97677500  |
| H | 4.04222900 | 3.73733400  | 0.43605100  |



|   |             |             |             |
|---|-------------|-------------|-------------|
| H | 5.47528400  | 4.38759600  | -1.25142700 |
| H | 4.60097900  | 3.20916100  | -1.81292200 |
| H | 6.53963200  | 2.44527800  | -0.64532600 |
| H | 7.24364800  | 1.61421400  | 0.49486900  |
| H | 6.80230600  | 0.11460700  | 2.05216800  |
| H | 6.14119100  | 1.47508800  | 2.40687400  |
| H | 7.25502700  | -2.11708100 | 2.46850500  |
| H | 6.56722900  | -2.06231100 | 1.04630000  |
| H | 6.89086200  | -1.78003500 | -0.97481400 |
| H | 5.85933500  | -2.94249400 | -0.74864100 |
| H | 7.77835300  | -0.25345800 | -2.50433100 |
| H | 7.15948700  | 0.57761600  | -1.29713600 |
| H | 4.39866000  | -4.55690000 | -1.44577400 |
| H | 3.63359700  | -3.55860000 | -0.50609400 |
| H | 3.13687100  | -3.17122800 | 1.52537000  |
| H | 1.89332100  | -2.98521800 | 0.60931800  |
| H | 4.96731000  | -2.13508900 | 2.60786400  |
| H | 4.09404600  | -2.91297000 | 3.65603200  |
| H | -0.11091200 | -1.67558000 | -0.05551000 |
| H | 1.72649500  | -0.91485600 | -0.91717600 |
| H | 2.30375800  | -1.21118700 | -2.38415800 |
| H | 1.56775000  | 0.93380500  | -2.06173400 |
| H | 3.74295900  | -1.61705700 | -3.66082400 |
| H | 3.50704900  | -2.85622100 | -2.77496300 |
| H | 1.08678100  | 2.38605800  | -0.52337500 |
| H | 0.50146900  | 1.89538100  | -2.72630800 |

|   |             |             |             |
|---|-------------|-------------|-------------|
| H | 1.00546900  | 1.08830300  | 1.52491500  |
| H | 0.18827900  | 2.98437500  | 0.61403800  |
| H | 1.48722600  | 0.24459500  | 2.77159900  |
| H | 0.78279800  | -0.94825700 | 1.03100300  |
| H | 4.17473600  | 1.78035700  | -3.26763200 |
| H | 2.89058900  | 2.56235900  | -2.89808500 |
| H | 5.49191000  | -0.06728900 | -2.64575200 |
| H | 3.97184300  | -0.06626500 | -2.23714200 |
| H | 3.44584000  | 0.81032200  | 3.53562800  |
| H | 3.25945500  | -0.73569600 | 3.48062500  |
| P | -4.54487700 | -0.05252700 | -0.30165700 |
| C | -3.74476100 | -0.60191700 | -1.72144100 |
| H | -4.27565400 | -0.54300700 | -2.66200600 |
| C | -2.46850000 | -1.20927700 | -1.65501500 |
| O | -2.02592700 | -1.63507200 | -2.87477900 |
| O | -1.79261700 | -1.37555500 | -0.61957700 |
| C | -4.85539900 | -1.36261400 | 0.94492100  |
| C | -0.75436600 | -2.28941900 | -2.89996400 |
| H | 0.04825200  | -1.60621900 | -2.61175100 |
| H | -0.74137000 | -3.15722700 | -2.23305100 |
| H | -0.60767100 | -2.61002200 | -3.93237100 |
| C | -2.53406800 | 1.06764100  | 1.31406700  |
| C | -3.74843400 | 1.30770700  | 0.64848700  |
| C | -4.32605100 | 2.58628100  | 0.71169800  |
| C | -3.70165700 | 3.60677400  | 1.43040600  |
| C | -2.50207100 | 3.35886300  | 2.10084400  |

|   |             |             |             |
|---|-------------|-------------|-------------|
| C | -1.92017400 | 2.08907400  | 2.04235300  |
| H | -2.06192200 | 0.09313500  | 1.26011400  |
| H | -5.26519700 | 2.78876300  | 0.20740500  |
| H | -4.16086800 | 4.59076700  | 1.47462100  |
| H | -2.02839400 | 4.14994000  | 2.67710400  |
| H | -0.99309500 | 1.86097600  | 2.56022300  |
| C | -5.36631500 | -2.08880800 | 3.20093600  |
| C | -5.08960800 | -1.06378800 | 2.29573500  |
| C | -4.89012800 | -2.69587000 | 0.51530800  |
| C | -5.16276100 | -3.71763500 | 1.42425900  |
| C | -5.40241700 | -3.41534200 | 2.76617800  |
| H | -5.54297600 | -1.85159500 | 4.24639700  |
| H | -5.04397500 | -0.03632100 | 2.64404100  |
| H | -4.68974000 | -2.92218900 | -0.52768300 |
| H | -5.17932900 | -4.74999300 | 1.08613400  |
| H | -5.60972100 | -4.21297500 | 3.47449600  |
| C | -6.17269800 | 0.57035700  | -0.85886300 |
| C | -7.35033100 | 0.26312200  | -0.16348100 |
| C | -6.24397000 | 1.37719200  | -2.00739100 |
| C | -8.57898400 | 0.75143800  | -0.61138100 |
| H | -7.31200000 | -0.36417600 | 0.72106000  |
| C | -7.47373300 | 1.86228300  | -2.45036500 |
| H | -5.33853300 | 1.62106900  | -2.55461900 |
| C | -8.64314700 | 1.55026500  | -1.75322400 |
| H | -9.48598100 | 0.50217200  | -0.06774900 |
| H | -7.51777600 | 2.48269700  | -3.34113800 |

H -9.60089500 1.92777900 -2.10081900

**Trans TS1 (on water)**

O 4.89304200 -3.62182200 0.43803800  
O 4.89658900 -2.54176900 2.83162900  
O 6.91442300 -0.65359400 2.84034000  
O 8.22626300 -0.64910100 0.35388100  
O 7.01238200 -2.58283400 -1.08833400  
O 5.68272000 -1.26910700 -3.23308700  
O 6.23747900 1.25270000 -3.16353700  
O 7.58562300 1.55774600 -0.78929300  
O 3.92364600 2.74478500 -2.75436000  
O 1.96656400 0.99162900 -2.86938700  
O 3.02651700 -1.60840800 -3.09109400  
O 1.16271300 0.79983300 -0.29285200  
O 3.04621400 2.18253200 1.01178400  
O 3.80382500 4.32805500 -0.39543700  
O 3.19273600 1.52452700 3.51399300  
O 2.51591200 -1.08640900 3.30018700  
O 1.09621600 -1.56040700 0.87798900  
O 6.02938700 1.74334000 3.42718500  
O 5.76019100 2.72305000 0.87765600  
O 2.43611300 -3.20844700 -0.79542200  
H 5.07189100 -4.55777200 0.61622500  
H 4.88239500 -3.18439600 1.35200500  
H 4.07579000 -2.02512400 2.98527300

|   |            |             |             |
|---|------------|-------------|-------------|
| H | 5.62908800 | -1.88033300 | 2.87009900  |
| H | 7.58645600 | -0.83644900 | 3.51474700  |
| H | 6.56275700 | 0.27152700  | 3.06785900  |
| H | 7.77184000 | -0.66785200 | 1.22646100  |
| H | 7.83461900 | -1.40600700 | -0.16648800 |
| H | 6.55189200 | -2.11763600 | -1.81902000 |
| H | 6.28708700 | -2.96339900 | -0.54416300 |
| H | 6.14397200 | -1.58229100 | -4.02627900 |
| H | 5.88267800 | -0.26400400 | -3.19398200 |
| H | 6.78417300 | 1.39051300  | -2.35149000 |
| H | 5.42991000 | 1.80360200  | -3.02378400 |
| H | 8.41080800 | 2.06395200  | -0.83939800 |
| H | 7.84479200 | 0.66129100  | -0.35124800 |
| H | 3.78220700 | 3.30617000  | -3.53228900 |
| H | 3.16944800 | 2.06648100  | -2.78741400 |
| H | 2.30914200 | 0.09458600  | -3.08057800 |
| H | 1.64955600 | 0.89566700  | -1.93295700 |
| H | 4.01750400 | -1.51669900 | -3.18314300 |
| H | 2.73955900 | -2.12920100 | -3.85612800 |
| H | 0.22422900 | 1.08524700  | -0.30184400 |
| H | 2.32428400 | 1.69202300  | 0.53028800  |
| H | 3.10712100 | 3.08492500  | 0.58902900  |
| H | 3.07237800 | 1.87458700  | 2.56843500  |
| H | 4.68545700 | 4.13003700  | -0.01489000 |
| H | 3.81928300 | 3.84713300  | -1.25456400 |
| H | 2.71585200 | -0.11881000 | 3.43284600  |

|   |             |             |             |
|---|-------------|-------------|-------------|
| H | 2.68354700  | 2.12062600  | 4.08415600  |
| H | 1.59664100  | -1.48082100 | 1.71589800  |
| H | 2.17532800  | -1.41005700 | 4.14735100  |
| H | 1.58861200  | -2.21127200 | 0.30524700  |
| H | 1.14739000  | -0.12525300 | 0.10980400  |
| H | 6.06120600  | 2.23311200  | 2.56665100  |
| H | 5.06913600  | 1.68814000  | 3.62290600  |
| H | 6.42787700  | 2.31606100  | 0.26806200  |
| H | 4.93272000  | 2.20505800  | 0.77156200  |
| H | 3.30768500  | -3.41416500 | -0.38231700 |
| H | 2.64619700  | -2.63489800 | -1.56418700 |
| P | -3.86086200 | -0.95989700 | -0.00988300 |
| C | -2.61761600 | 1.30061500  | -0.99083300 |
| O | -2.70606100 | 2.01819400  | -2.12268900 |
| O | -1.56507000 | 1.15727600  | -0.36706400 |
| C | -1.49885100 | 2.67052500  | -2.56018800 |
| H | -1.16274600 | 3.38912600  | -1.80791500 |
| H | -0.70594300 | 1.94255900  | -2.75397200 |
| H | -1.77230800 | 3.18962500  | -3.47898500 |
| C | -4.47188600 | 1.62996900  | 0.98064900  |
| O | -5.49009700 | 0.96255100  | 1.42049500  |
| C | -3.91310000 | 0.79845700  | -0.50369200 |
| C | -4.69349700 | 3.08808800  | 0.57766900  |
| C | -3.63408000 | 4.00170900  | 0.51255200  |
| C | -3.86093400 | 5.33227200  | 0.15641200  |
| C | -5.15660000 | 5.76624200  | -0.13369500 |

|   |             |             |             |
|---|-------------|-------------|-------------|
| C | -6.22082300 | 4.86417500  | -0.05443400 |
| C | -5.98926800 | 3.53601300  | 0.30363000  |
| H | -3.52476000 | 1.56255200  | 1.56583400  |
| H | -4.72490500 | 0.94766500  | -1.21550000 |
| H | -2.62629200 | 3.66927600  | 0.75671500  |
| H | -3.02987100 | 6.03282800  | 0.11566900  |
| H | -5.33699300 | 6.80313000  | -0.40672100 |
| H | -7.23383800 | 5.20134500  | -0.26273400 |
| H | -6.80399500 | 2.82531000  | 0.40489700  |
| C | -1.03348300 | -3.04410000 | -3.03422500 |
| C | -2.09846800 | -2.24809500 | -3.46539500 |
| C | -2.92224600 | -1.62427300 | -2.53295100 |
| C | -1.63215400 | -2.60515900 | -0.73194600 |
| C | -0.79662200 | -3.21734100 | -1.67177300 |
| H | -0.38678500 | -3.52573100 | -3.76339400 |
| H | -2.28441900 | -2.10674800 | -4.52652200 |
| H | -3.74092300 | -0.99970300 | -2.87923200 |
| H | -1.42121200 | -2.73907400 | 0.32165900  |
| H | 0.05646900  | -3.79634200 | -1.33128300 |
| C | -2.69715800 | -1.80014500 | -1.15435600 |
| C | -3.31052300 | -1.23223700 | 1.70457500  |
| C | -4.22269800 | -1.69884400 | 2.66236200  |
| C | -1.98146500 | -0.97136500 | 2.07157100  |
| C | -3.79961300 | -1.92493200 | 3.97005900  |
| H | -5.25838300 | -1.86525900 | 2.39169100  |
| C | -1.56738800 | -1.20651000 | 3.38335800  |

|   |             |             |             |
|---|-------------|-------------|-------------|
| H | -1.26889400 | -0.59764800 | 1.34799200  |
| C | -2.47197200 | -1.68278100 | 4.33166800  |
| H | -4.51072800 | -2.28321900 | 4.70881700  |
| H | -0.53005100 | -1.01875200 | 3.64697000  |
| H | -2.14761900 | -1.86378700 | 5.35330100  |
| C | -6.68177300 | -1.14126200 | -0.10007000 |
| C | -7.87685300 | -1.82052900 | -0.34384300 |
| C | -7.86529800 | -3.14613600 | -0.77906600 |
| C | -6.64948700 | -3.80559700 | -0.97214100 |
| C | -5.44807800 | -3.13730500 | -0.74309700 |
| H | -6.66141700 | -0.12384600 | 0.28899100  |
| H | -8.82142400 | -1.30738100 | -0.18515700 |
| H | -8.80067800 | -3.66741600 | -0.96580000 |
| H | -6.63339900 | -4.83925400 | -1.30636500 |
| H | -4.50987500 | -3.65639600 | -0.90861800 |
| C | -5.45926700 | -1.80033000 | -0.30709800 |

### **Trans OPI**

|   |            |             |             |
|---|------------|-------------|-------------|
| O | 4.75727100 | -3.45696000 | -1.03534300 |
| O | 4.44918600 | -3.57440000 | 1.57199000  |
| O | 6.43924900 | -1.96003600 | 2.63316600  |
| O | 8.13770500 | -1.04210100 | 0.59250100  |
| O | 7.13166500 | -2.09721900 | -1.67872100 |
| O | 6.25403300 | 0.11222700  | -3.24842700 |
| O | 6.83640000 | 2.32531500  | -2.05045700 |
| O | 7.74598700 | 1.48520800  | 0.39975200  |



|   |            |             |             |
|---|------------|-------------|-------------|
| O | 4.52390700 | 3.74233200  | -1.40807200 |
| O | 2.55789300 | 2.38911600  | -2.53102500 |
| O | 3.60801700 | 0.01692600  | -3.63271400 |
| O | 1.30501700 | 1.35651400  | -0.34842900 |
| O | 2.98321900 | 1.86727900  | 1.68952600  |
| O | 4.10707400 | 4.27509900  | 1.36386900  |
| O | 2.69934400 | 0.19412200  | 3.65953500  |
| O | 2.14526100 | -2.09920000 | 2.25626200  |
| O | 1.22973000 | -1.24188600 | -0.25367300 |
| O | 5.53000800 | 0.08202000  | 4.01158100  |
| O | 5.71533200 | 2.07116300  | 2.12730700  |
| O | 2.58266000 | -2.29083100 | -2.32428600 |
| H | 4.87629700 | -4.38903800 | -1.27383500 |
| H | 4.61607600 | -3.46882000 | -0.03176200 |
| H | 3.61151300 | -3.15457600 | 1.86260900  |
| H | 5.16144700 | -3.02592000 | 1.97935800  |
| H | 6.98985600 | -2.44596600 | 3.26609100  |
| H | 6.07240800 | -1.17447700 | 3.15959600  |
| H | 7.54816000 | -1.38197300 | 1.30363700  |
| H | 7.82077500 | -1.48125400 | -0.24664200 |
| H | 6.82045800 | -1.33187600 | -2.20728400 |
| H | 6.31157200 | -2.58833400 | -1.44650100 |
| H | 6.83830600 | 0.10422900  | -4.02204600 |
| H | 6.46734500 | 0.99170500  | -2.76626200 |
| H | 7.23039600 | 2.06173900  | -1.18282200 |
| H | 6.02844900 | 2.84319000  | -1.81797900 |

|   |            |             |             |
|---|------------|-------------|-------------|
| H | 8.57838400 | 1.88777700  | 0.69098900  |
| H | 7.90507200 | 0.46733900  | 0.45514800  |
| H | 4.54404600 | 4.58322900  | -1.89069100 |
| H | 3.76288700 | 3.22319800  | -1.83194100 |
| H | 2.93071600 | 1.59386200  | -2.97393800 |
| H | 2.06560500 | 2.01889900  | -1.75419900 |
| H | 4.60378100 | 0.03942300  | -3.54531500 |
| H | 3.42897200 | -0.08018300 | -4.58018100 |
| H | 0.37857500 | 1.66501800  | -0.27567700 |
| H | 2.34664000 | 1.70219500  | 0.94241700  |
| H | 3.17555200 | 2.84667800  | 1.68074500  |
| H | 2.73770700 | 0.92752000  | 2.96233000  |
| H | 4.89897500 | 3.83591100  | 1.73971700  |
| H | 4.22955800 | 4.16575500  | 0.39320600  |
| H | 2.31176100 | -1.30654200 | 2.82643700  |
| H | 2.20879800 | 0.55523700  | 4.41291900  |
| H | 1.65435200 | -1.54697000 | 0.57679600  |
| H | 1.27765200 | -2.43965000 | 2.52871000  |
| H | 1.73195200 | -1.65915600 | -1.00891500 |
| H | 1.26134300 | 0.34219100  | -0.34738900 |
| H | 5.72478600 | 0.87856900  | 3.45599700  |
| H | 4.54935900 | 0.05306300  | 4.02896800  |
| H | 6.44940500 | 1.86553800  | 1.49300200  |
| H | 4.88578800 | 1.74573200  | 1.71468100  |
| H | 3.35339300 | -2.75252300 | -1.91825000 |
| H | 2.96002200 | -1.50598700 | -2.77737100 |

|   |             |             |             |
|---|-------------|-------------|-------------|
| P | -3.95397900 | -0.67874000 | 0.09586700  |
| C | -2.38218900 | 1.64822000  | -0.99975800 |
| O | -2.30785900 | 1.68882700  | -2.33222600 |
| O | -1.45674300 | 1.96779600  | -0.26008200 |
| C | -1.03298700 | 2.05408800  | -2.90177100 |
| H | -0.72406400 | 3.04121900  | -2.55087500 |
| H | -0.27307300 | 1.31873400  | -2.63359000 |
| H | -1.19423500 | 2.06092500  | -3.97900500 |
| C | -4.24891600 | 1.64416500  | 0.83905300  |
| O | -4.85045000 | 0.41698300  | 1.23605200  |
| C | -3.71374800 | 1.16742000  | -0.51447200 |
| C | -5.21942700 | 2.80669000  | 0.79496200  |
| C | -4.79534400 | 4.08283300  | 1.18196000  |
| C | -5.66001500 | 5.17628300  | 1.10576100  |
| C | -6.96593200 | 5.00348000  | 0.64593600  |
| C | -7.39972600 | 3.73182000  | 0.26284700  |
| C | -6.53279500 | 2.64228300  | 0.33633600  |
| H | -3.41181600 | 1.90944400  | 1.50000600  |
| H | -4.45813200 | 1.29612800  | -1.30680300 |
| H | -3.77987700 | 4.21995400  | 1.54735500  |
| H | -5.31451100 | 6.16026400  | 1.41212700  |
| H | -7.64322400 | 5.85165500  | 0.59077600  |
| H | -8.41775200 | 3.58822100  | -0.09052700 |
| H | -6.87596700 | 1.65386600  | 0.04576500  |
| C | -1.79431600 | -2.09875100 | -3.85741500 |
| C | -3.12877200 | -1.68202000 | -3.87199700 |

|   |             |             |             |
|---|-------------|-------------|-------------|
| C | -3.75819700 | -1.31924600 | -2.68315300 |
| C | -1.74099500 | -1.79190600 | -1.45498500 |
| C | -1.10063900 | -2.14813500 | -2.64957700 |
| H | -1.30061500 | -2.38133200 | -4.78403400 |
| H | -3.67818000 | -1.63771000 | -4.80942800 |
| H | -4.79890000 | -1.00146700 | -2.71675200 |
| H | -1.16174800 | -1.83137300 | -0.53931200 |
| H | -0.05875200 | -2.45738200 | -2.62356500 |
| C | -3.07915000 | -1.37629700 | -1.45192200 |
| C | -2.80497900 | -1.26614900 | 1.42327900  |
| C | -3.06236400 | -2.47985700 | 2.07952800  |
| C | -1.71430000 | -0.48999100 | 1.84285800  |
| C | -2.25492600 | -2.90292100 | 3.13548100  |
| H | -3.90170600 | -3.09644500 | 1.77711800  |
| C | -0.91106600 | -0.91445700 | 2.90371600  |
| H | -1.47990800 | 0.44530300  | 1.34819900  |
| C | -1.17911400 | -2.11905800 | 3.55747300  |
| H | -2.47653300 | -3.84196000 | 3.63547000  |
| H | -0.07202200 | -0.29612200 | 3.21264800  |
| H | -0.56884700 | -2.43852500 | 4.39967200  |
| C | -6.67842900 | -1.45440500 | 0.55938100  |
| C | -7.75731200 | -2.33994700 | 0.52744700  |
| C | -7.61246700 | -3.60935400 | -0.03092800 |
| C | -6.37842500 | -3.99102100 | -0.55984200 |
| C | -5.30472000 | -3.10098800 | -0.54900300 |
| H | -6.78269700 | -0.48484200 | 1.02602400  |

|   |             |             |             |
|---|-------------|-------------|-------------|
| H | -8.71137000 | -2.03447700 | 0.94890800  |
| H | -8.45269900 | -4.29860100 | -0.05145700 |
| H | -6.24930500 | -4.98061000 | -0.98998400 |
| H | -4.36008600 | -3.41304900 | -0.97890600 |
| C | -5.43602800 | -1.81641500 | 0.01099100  |

### Trans OP2

|   |             |             |             |
|---|-------------|-------------|-------------|
| O | -5.16059200 | 3.18192900  | 1.72310100  |
| O | -5.20236600 | 1.42520100  | 3.67289900  |
| O | -7.18366700 | -0.40323800 | 3.02836000  |
| O | -8.49706600 | 0.40002600  | 0.67911400  |
| O | -7.29662300 | 2.70899800  | -0.03958200 |
| O | -6.01026200 | 2.16701500  | -2.51955000 |
| O | -6.51103200 | -0.25014200 | -3.27764600 |
| O | -7.85299800 | -1.30494100 | -1.12698000 |
| O | -4.14960400 | -1.72200800 | -3.35348200 |
| O | -2.20299300 | -0.01845800 | -2.87854100 |
| O | -3.35868200 | 2.48193500  | -2.30337000 |
| O | -1.34724300 | -0.72118000 | -0.40705400 |
| O | -3.29086600 | -2.38854300 | 0.34451500  |
| O | -4.01580200 | -4.00573700 | -1.66670600 |
| O | -3.44370300 | -2.62913200 | 2.91714400  |
| O | -2.82394000 | -0.07351500 | 3.57447400  |
| O | -1.25328500 | 1.09679900  | 1.50000400  |
| O | -6.26825600 | -2.84901000 | 2.78038300  |

|   |             |             |             |
|---|-------------|-------------|-------------|
| O | -5.98777500 | -2.91669200 | 0.05023000  |
| O | -2.70683600 | 3.11794500  | 0.39860000  |
| H | -5.32422300 | 4.02173900  | 2.17877500  |
| H | -5.16584600 | 2.48639800  | 2.46085400  |
| H | -4.37060100 | 0.90157600  | 3.66227500  |
| H | -5.91803200 | 0.77356800  | 3.47940500  |
| H | -7.85533300 | -0.46663900 | 3.72450800  |
| H | -6.81765700 | -1.34560000 | 2.93444300  |
| H | -8.04235300 | 0.13218800  | 1.51000300  |
| H | -8.10975000 | 1.28900600  | 0.43985800  |
| H | -6.84930200 | 2.51078100  | -0.88969300 |
| H | -6.56169600 | 2.88365100  | 0.59081200  |
| H | -6.47786100 | 2.71540000  | -3.16802500 |
| H | -6.19459900 | 1.20116000  | -2.81125800 |
| H | -7.05411100 | -0.65000200 | -2.55477000 |
| H | -5.68504200 | -0.79081800 | -3.30792600 |
| H | -8.67457700 | -1.77818300 | -1.32842000 |
| H | -8.11239200 | -0.60181800 | -0.41841000 |
| H | -3.99679400 | -1.98187500 | -4.27507500 |
| H | -3.40150600 | -1.06774000 | -3.14632700 |
| H | -2.55596400 | 0.89442300  | -2.79287800 |
| H | -1.85597800 | -0.22666400 | -1.97043000 |
| H | -4.34923900 | 2.39826300  | -2.40904400 |
| H | -3.11498000 | 3.29471800  | -2.77071000 |
| H | -0.45435200 | -1.12002300 | -0.50238700 |
| H | -2.55948600 | -1.76869300 | 0.06087200  |

|   |             |             |             |
|---|-------------|-------------|-------------|
| H | -3.32944100 | -3.11433800 | -0.33849800 |
| H | -3.32095300 | -2.63019700 | 1.90818400  |
| H | -4.89593600 | -3.94700500 | -1.23835400 |
| H | -4.03768500 | -3.26759200 | -2.31778100 |
| H | -3.00959900 | -1.03232600 | 3.37970400  |
| H | -2.90858000 | -3.36522300 | 3.25053000  |
| H | -1.77856300 | 0.72383500  | 2.23878000  |
| H | -2.36282000 | -0.06092800 | 4.42652100  |
| H | -1.79084300 | 1.85470100  | 1.14546000  |
| H | -1.26382400 | -0.00441500 | 0.30096300  |
| H | -6.29436600 | -3.01997800 | 1.80499800  |
| H | -5.30753200 | -2.84816500 | 2.98325100  |
| H | -6.66963600 | -2.34604100 | -0.38804500 |
| H | -5.17132700 | -2.37450700 | 0.11773500  |
| H | -3.55898100 | 3.20512400  | 0.88573300  |
| H | -2.96000600 | 2.82624200  | -0.50291900 |
| C | 2.54995100  | 1.43706600  | -0.85110000 |
| O | 3.98224400  | -0.47874200 | 1.28116400  |
| C | 3.72939400  | -1.76666200 | 0.62425800  |
| C | 3.56767400  | -1.36272000 | -0.81523900 |
| P | 3.94949600  | 0.66874100  | 0.07846100  |
| C | 4.81746500  | -2.76509400 | 0.97180000  |
| C | 5.00771100  | -3.89889400 | 0.17066900  |
| C | 5.95902800  | -4.86065100 | 0.51193700  |
| C | 6.73825000  | -4.70175000 | 1.65944300  |
| C | 6.55325700  | -3.57747400 | 2.46527000  |

|   |            |             |             |
|---|------------|-------------|-------------|
| C | 5.59558500 | -2.61885600 | 2.12804600  |
| H | 2.77196400 | -2.11898600 | 1.02228800  |
| H | 4.40763400 | -4.02751200 | -0.72626400 |
| H | 6.09449000 | -5.73236000 | -0.12308200 |
| H | 7.48270200 | -5.44832700 | 1.92307100  |
| H | 7.15335200 | -3.44499200 | 3.36200000  |
| H | 5.45103900 | -1.74656000 | 2.75737900  |
| H | 4.37624900 | -1.62845400 | -1.49366900 |
| C | 2.23988900 | -1.61721300 | -1.37037500 |
| O | 1.21255600 | -1.75006600 | -0.70376300 |
| O | 2.22886800 | -1.66716100 | -2.72392100 |
| C | 0.94251700 | -1.84761600 | -3.34091900 |
| H | 1.14880000 | -1.95905600 | -4.40655400 |
| H | 0.45447600 | -2.74611000 | -2.95393800 |
| H | 0.29542500 | -0.98280300 | -3.17112800 |
| C | 5.54649000 | 0.85091700  | -0.81808100 |
| C | 6.64279300 | 0.11064400  | -0.35022900 |
| C | 5.72602500 | 1.71734000  | -1.90675500 |
| C | 7.88785800 | 0.22629200  | -0.96757500 |
| H | 6.52545800 | -0.55948100 | 0.49479700  |
| C | 6.97527400 | 1.82939500  | -2.52034100 |
| H | 4.89878600 | 2.31137600  | -2.27964000 |
| C | 8.05831500 | 1.08323400  | -2.05595800 |
| H | 8.72515400 | -0.35700800 | -0.59430000 |
| H | 7.09757500 | 2.50462000  | -3.36307100 |
| H | 9.02868700 | 1.17050900  | -2.53700100 |



|   |             |            |             |
|---|-------------|------------|-------------|
| C | 4.15382100  | 2.03281800 | 1.36966100  |
| C | 4.63881500  | 3.29096500 | 0.97817700  |
| C | 3.78207500  | 1.85979300 | 2.71285000  |
| C | 4.75947500  | 4.33628600 | 1.89331100  |
| H | 4.93827900  | 3.46413100 | -0.05098000 |
| C | 3.89737600  | 2.90726300 | 3.63011200  |
| H | 3.40313900  | 0.90030200 | 3.04278300  |
| C | 4.38815300  | 4.14793200 | 3.22547100  |
| H | 5.14442500  | 5.29802500 | 1.56397600  |
| H | 3.60248500  | 2.74820200 | 4.66432800  |
| H | 4.48051000  | 4.96146800 | 3.94032100  |
| C | 0.46236300  | 2.67834500 | -0.87914100 |
| C | 1.52462300  | 2.10939900 | -0.17141300 |
| C | 2.48912500  | 1.33227900 | -2.25199600 |
| C | 1.44929000  | 1.93372700 | -2.95694500 |
| C | 0.43244300  | 2.60249500 | -2.27052400 |
| H | -0.33939400 | 3.17061900 | -0.33712400 |
| H | 1.53197000  | 2.18119800 | 0.91014700  |
| H | 3.24167700  | 0.76932800 | -2.79172900 |
| H | 1.42366000  | 1.86234000 | -4.04101900 |
| H | -0.39004400 | 3.04859500 | -2.82284100 |

### **Trans PW complex**

|   |             |             |             |
|---|-------------|-------------|-------------|
| O | -2.56987300 | -3.56389900 | -2.03920000 |
| O | -1.31028700 | -1.67529000 | -3.31941600 |

|   |             |             |             |
|---|-------------|-------------|-------------|
| O | -3.34760100 | 0.05518600  | -4.13134700 |
| O | -5.87423300 | -0.97189700 | -3.48973200 |
| O | -5.34926200 | -3.30969100 | -2.24603600 |
| O | -6.16584100 | -2.97828200 | 0.46659600  |
| O | -7.31474300 | -0.67332200 | 0.71000200  |
| O | -6.89604100 | 0.56284600  | -1.70893700 |
| O | -5.87552100 | 0.87569700  | 2.52757000  |
| O | -4.03037800 | -0.68795000 | 3.53159100  |
| O | -4.08611600 | -3.15470600 | 2.15468000  |
| O | -1.71434900 | 0.32479200  | 2.47868700  |
| O | -2.78355200 | 1.76796000  | 0.49340400  |
| O | -4.75459800 | 3.26363700  | 1.56115100  |
| O | -1.03698200 | 2.27786100  | -1.40756500 |
| O | 0.06111500  | -0.26669600 | -1.37498600 |
| O | -0.43780800 | -1.44839500 | 1.06426300  |
| O | -3.14374100 | 2.52241500  | -3.25465700 |
| O | -4.92178800 | 2.36346100  | -1.12902500 |
| O | -1.76477500 | -3.76405400 | 0.61066600  |
| H | -2.29812300 | -4.36032800 | -2.52028100 |
| H | -2.08119600 | -2.80465800 | -2.51257600 |
| H | -0.73152400 | -1.18442300 | -2.68762300 |
| H | -1.99258600 | -1.02569900 | -3.60891100 |
| H | -3.30999400 | 0.14239200  | -5.09613100 |
| H | -3.26284000 | 1.00492900  | -3.78476600 |
| H | -4.98406700 | -0.62058000 | -3.72398800 |
| H | -5.70417300 | -1.86940600 | -3.08552300 |

|   |             |             |             |
|---|-------------|-------------|-------------|
| H | -5.61746300 | -3.17981100 | -1.31181900 |
| H | -4.36961100 | -3.40238500 | -2.20787900 |
| H | -6.89267000 | -3.61239100 | 0.56336000  |
| H | -6.60453300 | -2.05820200 | 0.56669200  |
| H | -7.23411300 | -0.22346900 | -0.16703900 |
| H | -6.81508200 | -0.10141100 | 1.34038000  |
| H | -7.68392200 | 0.93887400  | -2.12994600 |
| H | -6.48882800 | -0.07040500 | -2.41584900 |
| H | -6.45681700 | 1.02974900  | 3.28826400  |
| H | -5.13864300 | 0.27543800  | 2.88990200  |
| H | -4.03816500 | -1.55405500 | 3.06456000  |
| H | -3.14650300 | -0.30392700 | 3.31730600  |
| H | -4.87696800 | -3.13139600 | 1.54458500  |
| H | -4.27158000 | -3.85659900 | 2.79678500  |
| H | -1.05100700 | 1.00287600  | 2.71165700  |
| H | -2.44318100 | 1.13556300  | 1.18510600  |
| H | -3.33168900 | 2.43267700  | 0.98921300  |
| H | -1.65903500 | 2.16366700  | -0.62674000 |
| H | -5.07350100 | 3.26076700  | 0.63235100  |
| H | -5.19891600 | 2.47617200  | 1.95524800  |
| H | -0.23569200 | 0.67454600  | -1.41346700 |
| H | -0.45606300 | 3.01860100  | -1.17149100 |
| H | -0.34022600 | -1.02389300 | 0.17643400  |
| H | 1.03925100  | -0.25180100 | -1.24197000 |
| H | -0.94375700 | -2.29314700 | 0.90557200  |
| H | -1.19889700 | -0.40620500 | 2.00051300  |

|   |             |             |             |
|---|-------------|-------------|-------------|
| H | -3.86467000 | 2.61730200  | -2.58524300 |
| H | -2.32056600 | 2.54786200  | -2.71677800 |
| H | -5.67314500 | 1.75737700  | -1.35384100 |
| H | -4.25655800 | 1.80225700  | -0.67370000 |
| H | -2.05762700 | -3.70794300 | -0.33021600 |
| H | -2.58052300 | -3.63148200 | 1.13976400  |
| O | 2.71274000  | -0.18624300 | -0.63435800 |
| C | 1.71237300  | 3.52167100  | 0.14318900  |
| C | 0.86033900  | 4.25853900  | 0.88790000  |
| P | 3.55611700  | -1.21608200 | 0.10526200  |
| C | 2.58475900  | 3.98902300  | -0.93398000 |
| C | 2.71492000  | 5.34773000  | -1.28520800 |
| C | 3.55964900  | 5.73246600  | -2.31960400 |
| C | 4.29291300  | 4.77053800  | -3.02384600 |
| C | 4.17538000  | 3.42246900  | -2.68446100 |
| C | 3.32959500  | 3.03075500  | -1.64793700 |
| H | 1.75760300  | 2.45308700  | 0.34741800  |
| H | 2.15794600  | 6.10593900  | -0.74240500 |
| H | 3.65074600  | 6.78361000  | -2.57914100 |
| H | 4.95271100  | 5.07537800  | -3.83175500 |
| H | 4.74478600  | 2.67196400  | -3.22568500 |
| H | 3.23513700  | 1.97947400  | -1.38404400 |
| H | 0.72369200  | 5.32515100  | 0.74160300  |
| C | 0.04533000  | 3.64820300  | 1.95308100  |
| O | 0.12941700  | 2.48612100  | 2.33623600  |
| O | -0.81011500 | 4.55193100  | 2.46152900  |

|   |             |             |             |
|---|-------------|-------------|-------------|
| C | -1.73697900 | 4.11660000  | 3.47453900  |
| H | -1.97334600 | 5.00651600  | 4.05927200  |
| H | -2.64436100 | 3.73873900  | 2.99542800  |
| H | -1.28501700 | 3.34928400  | 4.10573100  |
| C | 5.32455300  | -0.94112400 | -0.28112600 |
| C | 6.35899500  | -1.09548600 | 0.65165600  |
| C | 5.63701400  | -0.54348200 | -1.59182000 |
| C | 7.68399100  | -0.86510700 | 0.27762600  |
| H | 6.13400500  | -1.38092100 | 1.67423800  |
| C | 6.96224300  | -0.31976200 | -1.96366300 |
| H | 4.83668500  | -0.40153900 | -2.31220400 |
| C | 7.98767400  | -0.48089200 | -1.02915600 |
| H | 8.47792700  | -0.98122200 | 1.01035600  |
| H | 7.19427900  | -0.01557100 | -2.98082100 |
| H | 9.01998800  | -0.30186000 | -1.31765300 |
| C | 3.34353700  | -1.11140000 | 1.91286300  |
| C | 2.64653400  | -0.01735000 | 2.43969100  |
| C | 3.83041000  | -2.10267200 | 2.78042200  |
| C | 2.45908400  | 0.09910400  | 3.81723000  |
| H | 2.22685000  | 0.72808800  | 1.77486000  |
| C | 3.65019100  | -1.97834400 | 4.15748300  |
| H | 4.33107000  | -2.98131300 | 2.38198200  |
| C | 2.96700200  | -0.87539500 | 4.67679000  |
| H | 1.90456700  | 0.94767700  | 4.20706100  |
| H | 4.02922500  | -2.74891800 | 4.82330900  |
| H | 2.81977900  | -0.78559100 | 5.74987200  |

|   |            |             |             |
|---|------------|-------------|-------------|
| C | 3.17200800 | -2.94484500 | -0.33043700 |
| C | 1.91935400 | -3.45028300 | 0.05939400  |
| C | 4.04596900 | -3.75451200 | -1.07086400 |
| C | 1.54592600 | -4.74577200 | -0.29527900 |
| H | 1.22888500 | -2.83207900 | 0.62800500  |
| C | 3.66954700 | -5.05380400 | -1.41594500 |
| H | 5.01683700 | -3.37725300 | -1.37718600 |
| C | 2.42195200 | -5.54841100 | -1.03063300 |
| H | 0.56728200 | -5.10944900 | 0.00611700  |
| H | 4.35182100 | -5.67778500 | -1.98716800 |
| H | 2.13342900 | -6.56021400 | -1.30440200 |

#### **Cis TS1**

|   |            |             |             |
|---|------------|-------------|-------------|
| O | 4.98583300 | -2.05897800 | 3.19823500  |
| O | 3.77882000 | 0.12585500  | 4.00787800  |
| O | 5.19907500 | 2.15944500  | 2.74788400  |
| O | 7.44368800 | 1.17396200  | 1.37743900  |
| O | 7.32456100 | -1.49438200 | 1.75931900  |
| O | 6.83077300 | -2.63275400 | -0.80421600 |
| O | 6.87450500 | -0.76162900 | -2.59082300 |
| O | 7.11233600 | 1.56349100  | -1.13687200 |
| O | 4.37369000 | -0.62089500 | -3.82599300 |
| O | 2.92632600 | -2.59171500 | -2.87197700 |
| O | 4.44693900 | -3.86199600 | -0.88707400 |
| O | 1.10093800 | -1.49686400 | -1.12188500 |
| O | 2.44417000 | 0.81208400  | -1.02237900 |

|   |            |             |             |
|---|------------|-------------|-------------|
| O | 2.95056400 | 1.76934900  | -3.48063000 |
| O | 1.38507600 | 2.12780500  | 0.98409700  |
| O | 1.27083800 | 0.09884600  | 2.74651000  |
| O | 1.08586000 | -2.34303800 | 1.36993500  |
| O | 3.74803700 | 3.64548700  | 1.14623300  |
| O | 4.56237500 | 2.53420900  | -1.26021400 |
| O | 3.33027200 | -3.77646400 | 1.74235100  |
| H | 5.24680900 | -2.48368500 | 4.02958500  |
| H | 4.50305400 | -1.21402500 | 3.48493000  |
| H | 2.86164700 | 0.15042900  | 3.65485600  |
| H | 4.24795400 | 0.87826600  | 3.57473500  |
| H | 5.53622500 | 2.77756500  | 3.41439800  |
| H | 4.63231800 | 2.73147000  | 2.12911900  |
| H | 6.65614000 | 1.51736800  | 1.85871600  |
| H | 7.45451200 | 0.19204400  | 1.56071600  |
| H | 7.13730000 | -1.87924000 | 0.87693100  |
| H | 6.51278500 | -1.67815800 | 2.28485800  |
| H | 7.62757100 | -3.15311500 | -0.98883600 |
| H | 6.83356600 | -1.88803300 | -1.50692300 |
| H | 7.00896700 | 0.09088100  | -2.10835400 |
| H | 5.99386100 | -0.68052000 | -3.02847600 |
| H | 7.83670700 | 2.15292300  | -1.39592200 |
| H | 7.25271500 | 1.38795100  | -0.12992100 |
| H | 4.49801600 | -0.88845500 | -4.74965300 |
| H | 3.79831100 | -1.35609400 | -3.42561800 |
| H | 3.46464400 | -3.07823600 | -2.20675600 |

|   |             |             |             |
|---|-------------|-------------|-------------|
| H | 2.15559200  | -2.26135600 | -2.35322400 |
| H | 5.35825300  | -3.45377000 | -0.86091700 |
| H | 4.58518200  | -4.80518200 | -1.06162600 |
| H | 0.23725000  | -1.04194300 | -1.19285500 |
| H | 2.06433800  | -0.10969700 | -1.02961600 |
| H | 2.41370500  | 1.13393300  | -1.96441600 |
| H | 1.69188000  | 1.65869300  | 0.14833600  |
| H | 3.60265500  | 2.31057900  | -2.98460400 |
| H | 3.46643700  | 0.96845100  | -3.73375600 |
| H | 1.24752300  | 0.86655400  | 2.10843200  |
| H | 0.54358900  | 2.56438600  | 0.75909300  |
| H | 1.25618800  | -1.50181500 | 1.84944300  |
| H | 0.41601800  | 0.11351600  | 3.20511300  |
| H | 1.87646800  | -2.92732600 | 1.55579900  |
| H | 1.10432900  | -1.90097300 | -0.19496000 |
| H | 4.08797700  | 3.43783800  | 0.24149800  |
| H | 2.84796100  | 3.24771800  | 1.15515800  |
| H | 5.51713300  | 2.26982200  | -1.25499500 |
| H | 4.07211900  | 1.72648800  | -0.99300000 |
| H | 3.92071500  | -3.19139100 | 2.27119800  |
| H | 3.72310500  | -3.78174200 | 0.84384800  |
| O | -3.87735500 | 1.96696100  | 1.28165500  |
| C | -3.70827800 | 2.38679500  | 0.07287300  |
| P | -4.17030900 | -0.42981200 | 0.00327000  |
| C | -3.46648000 | 0.90873300  | -1.01912200 |
| C | -2.56312100 | 3.36052400  | -0.17786100 |



|   |             |             |             |
|---|-------------|-------------|-------------|
| C | -1.68626600 | 3.64340700  | 0.87638800  |
| C | -0.67383000 | 4.59540700  | 0.72104000  |
| C | -0.52114300 | 5.26522900  | -0.49746800 |
| C | -1.39736800 | 4.99159600  | -1.54989200 |
| C | -2.41655100 | 4.05133800  | -1.38601200 |
| H | -4.61082300 | 2.75031500  | -0.47220900 |
| H | -4.14014500 | 1.07298900  | -1.86167400 |
| H | -1.85492700 | 3.12878100  | 1.81788200  |
| H | -0.01251000 | 4.82897500  | 1.55241200  |
| H | 0.26694700  | 6.00340600  | -0.61900300 |
| H | -1.29275400 | 5.51829100  | -2.49515000 |
| H | -3.10526500 | 3.85387000  | -2.20463200 |
| C | -2.09014000 | 0.68408200  | -1.48034500 |
| O | -1.87878300 | 1.22980800  | -2.69653000 |
| O | -1.20345500 | 0.11820500  | -0.84095300 |
| C | -3.95876700 | -1.99542700 | -0.93866300 |
| C | -0.51926100 | 1.22829800  | -3.17547600 |
| H | 0.15495900  | 1.65337600  | -2.43203800 |
| H | -0.20010200 | 0.20993300  | -3.41539100 |
| H | -0.52502300 | 1.84172300  | -4.07548600 |
| C | -2.19444100 | -1.39421100 | 1.73934800  |
| C | -3.45920900 | -0.79417100 | 1.64704200  |
| C | -4.21667200 | -0.59224000 | 2.81048200  |
| C | -3.71071600 | -0.98209400 | 4.04834100  |
| C | -2.44960800 | -1.57635600 | 4.13941500  |
| C | -1.69279200 | -1.78077600 | 2.98457200  |

|   |             |             |             |
|---|-------------|-------------|-------------|
| H | -1.58939400 | -1.56168000 | 0.85760300  |
| H | -5.18983600 | -0.12094100 | 2.75507100  |
| H | -4.30503900 | -0.81792700 | 4.94285100  |
| H | -2.06353700 | -1.88736100 | 5.10680300  |
| H | -0.71854700 | -2.25948000 | 3.01599100  |
| C | -3.92540000 | -4.42421500 | -0.98998200 |
| C | -4.03299800 | -3.23165100 | -0.27541000 |
| C | -3.78000900 | -1.98140100 | -2.33133200 |
| C | -3.66973500 | -3.17701100 | -3.04188800 |
| C | -3.74169300 | -4.39955200 | -2.37351600 |
| H | -3.97677900 | -5.37208700 | -0.46198800 |
| H | -4.16391800 | -3.26500700 | 0.80102900  |
| H | -3.71274900 | -1.04038000 | -2.86733900 |
| H | -3.52116600 | -3.14960300 | -4.11758500 |
| H | -3.65018600 | -5.32960700 | -2.92753100 |
| C | -5.98769900 | -0.16812600 | 0.09815100  |
| C | -6.85176300 | -1.09806800 | -0.50487400 |
| C | -6.52790800 | 0.95929000  | 0.74450900  |
| C | -8.23270800 | -0.90404700 | -0.46166000 |
| H | -6.45862400 | -1.97317200 | -1.00866900 |
| C | -7.91046600 | 1.13870300  | 0.78307400  |
| H | -5.83792300 | 1.66215800  | 1.21155400  |
| C | -8.76511300 | 0.21295300  | 0.18200700  |
| H | -8.88939300 | -1.63035500 | -0.93238400 |
| H | -8.31869400 | 2.01129500  | 1.28570700  |
| H | -9.84128700 | 0.36116900  | 0.21442600  |

**Cis OP1**

|   |            |             |             |
|---|------------|-------------|-------------|
| O | 4.50567700 | -3.79884200 | -0.44987800 |
| O | 4.14576900 | -3.47276200 | 2.13275200  |
| O | 6.13624900 | -1.71334100 | 2.93326900  |
| O | 7.85692500 | -1.13960600 | 0.79015000  |
| O | 6.87721200 | -2.55040800 | -1.29116200 |
| O | 6.01293000 | -0.62739600 | -3.20815200 |
| O | 6.59123000 | 1.75270500  | -2.38553100 |
| O | 7.46677300 | 1.32099900  | 0.18000700  |
| O | 4.27139600 | 3.25006700  | -1.99748100 |
| O | 2.30942600 | 1.72739200  | -2.88956600 |
| O | 3.36988800 | -0.78604000 | -3.59834300 |
| O | 1.04715100 | 1.04341800  | -0.58818000 |
| O | 2.69810900 | 1.89454700  | 1.35187400  |
| O | 3.82453300 | 4.22303100  | 0.64824600  |
| O | 2.41066700 | 0.57733000  | 3.57734800  |
| O | 1.84718000 | -1.89888700 | 2.54298100  |
| O | 1.00599500 | -1.50974000 | -0.09046000 |
| O | 5.22727200 | 0.52234000  | 3.96420300  |
| O | 5.42280200 | 2.17497700  | 1.77892100  |
| O | 2.35479300 | -2.88735900 | -1.96471400 |
| H | 4.63509100 | -4.75695700 | -0.52063200 |
| H | 4.34123400 | -3.63856100 | 0.53749600  |
| H | 3.30591600 | -3.01080100 | 2.34278800  |
| H | 4.85524400 | -2.86551900 | 2.45204000  |

|   |            |             |             |
|---|------------|-------------|-------------|
| H | 6.67965800 | -2.09428600 | 3.63999500  |
| H | 5.76810200 | -0.85310900 | 3.32621100  |
| H | 7.25757600 | -1.35909900 | 1.53963200  |
| H | 7.55000200 | -1.70955700 | 0.02968900  |
| H | 6.56754700 | -1.88077300 | -1.93741800 |
| H | 6.05685200 | -2.99994900 | -0.98659200 |
| H | 6.60564400 | -0.76528100 | -3.96283800 |
| H | 6.22462300 | 0.31936500  | -2.87636200 |
| H | 6.97422700 | 1.63329900  | -1.48178100 |
| H | 5.78155600 | 2.30094000  | -2.24867900 |
| H | 8.29483000 | 1.76704400  | 0.41481100  |
| H | 7.62487900 | 0.32624900  | 0.40313600  |
| H | 4.28864200 | 4.00328300  | -2.60796400 |
| H | 3.51322000 | 2.66679800  | -2.33290000 |
| H | 2.68314500 | 0.87281600  | -3.20266900 |
| H | 1.81705700 | 1.48130600  | -2.06353800 |
| H | 4.36463700 | -0.74726100 | -3.50749300 |
| H | 3.19874500 | -1.03286000 | -4.51973700 |
| H | 0.11253300 | 1.33515100  | -0.56405400 |
| H | 2.06725100 | 1.60233200  | 0.63859300  |
| H | 2.88292500 | 2.86020100  | 1.18335200  |
| H | 2.44544200 | 1.18033300  | 2.76527000  |
| H | 4.60955100 | 3.84842700  | 1.10067200  |
| H | 3.95831900 | 3.95562400  | -0.28950400 |
| H | 2.00322600 | -1.02310200 | 2.97931100  |
| H | 1.90332300 | 1.05371600  | 4.25111900  |

|   |             |             |             |
|---|-------------|-------------|-------------|
| H | 1.43331600  | -1.65851600 | 0.78052800  |
| H | 0.94986600  | -2.16569000 | 2.80309600  |
| H | 1.50778400  | -2.04804300 | -0.76415400 |
| H | 1.02009000  | 0.04039700  | -0.43739800 |
| H | 5.42645300  | 1.21721600  | 3.28724100  |
| H | 4.24581300  | 0.49735600  | 3.97829600  |
| H | 6.15884800  | 1.86960200  | 1.18907000  |
| H | 4.59451300  | 1.78574000  | 1.42195100  |
| H | 3.12260400  | -3.26716200 | -1.47690600 |
| H | 2.73025000  | -2.17586000 | -2.52706200 |
| O | -4.46093800 | 0.91163100  | 1.10879300  |
| C | -4.67430300 | 1.85068900  | 0.06579700  |
| P | -4.04926000 | -0.51963400 | 0.06831300  |
| C | -4.04026700 | 1.04914200  | -1.08738200 |
| C | -4.13763700 | 3.23555400  | 0.37486700  |
| C | -3.59106900 | 3.53407300  | 1.62563500  |
| C | -3.13480300 | 4.82364500  | 1.90693100  |
| C | -3.21950600 | 5.82776700  | 0.94190600  |
| C | -3.77076500 | 5.53714300  | -0.30836800 |
| C | -4.23144600 | 4.25070300  | -0.58668900 |
| H | -5.75235600 | 1.94889500  | -0.15243800 |
| H | -4.65072300 | 0.93031500  | -1.98411800 |
| H | -3.53401100 | 2.74727400  | 2.36997400  |
| H | -2.71150400 | 5.04356700  | 2.88384700  |
| H | -2.86124100 | 6.83007400  | 1.16113200  |
| H | -3.84462100 | 6.31320400  | -1.06598500 |

|   |             |             |             |
|---|-------------|-------------|-------------|
| H | -4.66652600 | 4.03423100  | -1.56091000 |
| C | -2.63412900 | 1.42314500  | -1.46731200 |
| O | -2.48579900 | 1.57590200  | -2.78749800 |
| O | -1.72389200 | 1.55646200  | -0.66162100 |
| C | -1.15086800 | 1.87148200  | -3.25299000 |
| H | -0.79162000 | 2.80482300  | -2.81407400 |
| H | -0.46740700 | 1.06239600  | -2.99265100 |
| H | -1.23878000 | 1.96525500  | -4.33478600 |
| C | -1.34727200 | -2.71234700 | -2.32282600 |
| C | -1.95541300 | -2.08226800 | -1.22933300 |
| C | -3.95010100 | -1.75276100 | -2.53262100 |
| C | -3.35764300 | -2.39766200 | -3.61654600 |
| C | -2.05009700 | -2.88132900 | -3.51368300 |
| H | -0.31985500 | -3.05599500 | -2.23361200 |
| H | -1.36143200 | -1.95394000 | -0.33189400 |
| H | -4.96612600 | -1.37921900 | -2.64206400 |
| H | -3.91461800 | -2.51648800 | -4.54295300 |
| H | -1.58295700 | -3.37713700 | -4.36103800 |
| C | -3.27027900 | -1.60138400 | -1.30714000 |
| C | -2.96898100 | -1.12817700 | 1.46474100  |
| C | -3.07536200 | -2.45894300 | 1.89302200  |
| C | -2.06958900 | -0.27346200 | 2.11402900  |
| C | -2.32522600 | -2.91855700 | 2.97582000  |
| H | -3.75945800 | -3.13940600 | 1.39540100  |
| C | -1.30162100 | -0.74074500 | 3.18285500  |
| H | -1.97429600 | 0.75303800  | 1.78292300  |

|   |             |             |             |
|---|-------------|-------------|-------------|
| C | -1.43749600 | -2.05876300 | 3.62797900  |
| H | -2.43968800 | -3.94503100 | 3.31353300  |
| H | -0.60073600 | -0.06774700 | 3.67086500  |
| H | -0.87156700 | -2.41072900 | 4.48826700  |
| C | -5.71344300 | -1.32709000 | 0.22812100  |
| C | -6.73376600 | -0.67656500 | 0.94322000  |
| C | -5.96962900 | -2.61408400 | -0.27572000 |
| C | -7.97852400 | -1.28119000 | 1.11989700  |
| H | -6.52940500 | 0.29201200  | 1.38200600  |
| C | -7.21113000 | -3.22203500 | -0.08510600 |
| H | -5.20196600 | -3.14930700 | -0.82120200 |
| C | -8.22308500 | -2.55430600 | 0.60489600  |
| H | -8.75447000 | -0.75642900 | 1.67085200  |
| H | -7.38431200 | -4.21946400 | -0.48024800 |
| H | -9.19206600 | -3.02590500 | 0.74620400  |
